# Supplementary material for: Anisotropic optical properties induced by uniaxial strain of monolayer C3N: a first-principles study
Source: Royal Society of Chemistry journal article supplement (doi:10.1039/c9ra01024f), 2019-01-01
Supplement: c9ra01024f1.pdf [file c9ra01024f1.pdf]

## Supporting Information

### Structural details for monolayer C<sub>3</sub>N

Here is the POSCAR information for optimized C<sub>3</sub>N monolayer unit cell with lattice geometry and atom positions.

-----monolayer C<sub>3</sub>N unit cell POSCAR file begins-----

C3N UNIT CELL

1.0000000000000000

4.2088834623923717 -2.429999999999998 0.0000000000000000

0.0000000000000000 4.859999999999994 0.0000000000000000

0.0000000000000000 0.0000000000000000 30.0000000000000000

C N

6 2

Direct

0.3333894736219791 0.1666947368109896 -0.0000000000000000

0.8333052631890104 0.1666947368109896 -0.0000000000000000

0.8333052631890104 0.6666105263780209 0.0000000000000000

0.6666105263780209 0.8333052631890104 0.0000000000000000

0.1666947368109896 0.8333052631890104 0.0000000000000000

0.1666947368109896 0.3333894736219791 -0.0000000000000000

0.6666666666666643 0.3333333333333357 -0.0000000000000000

0.3333333333333357 0.6666666666666643 -0.0000000000000000

-----monolayer C<sub>3</sub>N supercell (3 × 3 × 1) POSCAR file begins-----

C3N SUPERCELL

1.0000000000000000

12.557812874522490 -7.250256643538519 0.0000000000000000

0.0000000000000000 14.500513287077009 0.0000000000000000

0.0000000000000000 0.0000000000000000 30.000055465349799

C N

54 18

Direct

0.1107173257825827 0.0553586628912914 0.0000000000000000

0.2779746704420422 0.0553586628912912 0.0000000000000000

0.2779746704420422 0.2226160075507505 0.0000000000000000

0.2226160075507508 0.2779746704420420 0.0000000000000000

0.0553586628912917 0.2779746704420419 0.0000000000000000

0.0553586628912917 0.1107173257825827 0.0000000000000000

0.4440506591159160 0.0553586628912913 0.0000000000000000

0.6113080037753756 0.0553586628912912 0.0000000000000000

0.6113080037753756 0.2226160075507506 0.0000000000000000

0.5559493408840842 0.2779746704420421 0.0000000000000000

0.3886919962246250 0.2779746704420419 0.0000000000000000

0.3886919962246250 0.1107173257825827 0.0000000000000000

0.7773839924492496 0.0553586628912913 0.0000000000000000

0.9446413371087091 0.0553586628912913 0.0000000000000000

0.9446413371087091 0.2226160075507506 0.0000000000000000

|                    |                    |                    |
|--------------------|--------------------|--------------------|
| 0.8892826742174177 | 0.2779746704420421 | 0.0000000000000000 |
| 0.7220253295579586 | 0.2779746704420420 | 0.0000000000000000 |
| 0.7220253295579586 | 0.1107173257825827 | 0.0000000000000000 |
| 0.1107173257825827 | 0.3886919962246246 | 0.0000000000000000 |
| 0.2779746704420422 | 0.3886919962246244 | 0.0000000000000000 |
| 0.2779746704420422 | 0.5559493408840837 | 0.0000000000000000 |
| 0.2226160075507508 | 0.6113080037753753 | 0.0000000000000000 |
| 0.0553586628912917 | 0.6113080037753753 | 0.0000000000000000 |
| 0.0553586628912917 | 0.4440506591159159 | 0.0000000000000000 |
| 0.4440506591159160 | 0.3886919962246246 | 0.0000000000000000 |
| 0.6113080037753756 | 0.3886919962246244 | 0.0000000000000000 |
| 0.6113080037753756 | 0.5559493408840838 | 0.0000000000000000 |
| 0.5559493408840842 | 0.6113080037753753 | 0.0000000000000000 |
| 0.3886919962246250 | 0.6113080037753753 | 0.0000000000000000 |
| 0.3886919962246250 | 0.4440506591159159 | 0.0000000000000000 |
| 0.7773839924492496 | 0.3886919962246247 | 0.0000000000000000 |
| 0.9446413371087091 | 0.3886919962246245 | 0.0000000000000000 |
| 0.9446413371087091 | 0.5559493408840839 | 0.0000000000000000 |
| 0.8892826742174177 | 0.6113080037753754 | 0.0000000000000000 |
| 0.7220253295579586 | 0.6113080037753753 | 0.0000000000000000 |
| 0.7220253295579586 | 0.4440506591159160 | 0.0000000000000000 |
| 0.1107173257825827 | 0.7220253295579580 | 0.0000000000000000 |
| 0.2779746704420422 | 0.7220253295579576 | 0.0000000000000000 |
| 0.2779746704420422 | 0.8892826742174170 | 0.0000000000000000 |
| 0.2226160075507508 | 0.9446413371087086 | 0.0000000000000000 |

|                    |                    |                    |
|--------------------|--------------------|--------------------|
| 0.0553586628912917 | 0.9446413371087087 | 0.0000000000000000 |
| 0.0553586628912917 | 0.7773839924492493 | 0.0000000000000000 |
| 0.4440506591159160 | 0.7220253295579580 | 0.0000000000000000 |
| 0.6113080037753756 | 0.7220253295579577 | 0.0000000000000000 |
| 0.6113080037753756 | 0.8892826742174171 | 0.0000000000000000 |
| 0.5559493408840842 | 0.9446413371087088 | 0.0000000000000000 |
| 0.3886919962246250 | 0.9446413371087086 | 0.0000000000000000 |
| 0.3886919962246250 | 0.7773839924492492 | 0.0000000000000000 |
| 0.7773839924492496 | 0.7220253295579580 | 0.0000000000000000 |
| 0.9446413371087091 | 0.7220253295579580 | 0.0000000000000000 |
| 0.9446413371087091 | 0.8892826742174174 | 0.0000000000000000 |
| 0.8892826742174177 | 0.9446413371087088 | 0.0000000000000000 |
| 0.7220253295579586 | 0.9446413371087088 | 0.0000000000000000 |
| 0.7220253295579586 | 0.7773839924492494 | 0.0000000000000000 |
| 0.2222222222222222 | 0.1111111111111110 | 0.0000000000000000 |
| 0.1111111111111112 | 0.2222222222222223 | 0.0000000000000000 |
| 0.5555555555555556 | 0.1111111111111111 | 0.0000000000000000 |
| 0.4444444444444444 | 0.2222222222222223 | 0.0000000000000000 |
| 0.8888888888888890 | 0.1111111111111110 | 0.0000000000000000 |
| 0.7777777777777782 | 0.2222222222222224 | 0.0000000000000000 |
| 0.2222222222222222 | 0.4444444444444443 | 0.0000000000000000 |
| 0.1111111111111112 | 0.5555555555555556 | 0.0000000000000000 |
| 0.5555555555555556 | 0.4444444444444443 | 0.0000000000000000 |
| 0.4444444444444444 | 0.5555555555555556 | 0.0000000000000000 |
| 0.8888888888888890 | 0.4444444444444443 | 0.0000000000000000 |

|                    |                   |                   |
|--------------------|-------------------|-------------------|
| 0.7777777777777782 | 0.555555555555556 | 0.000000000000000 |
| 0.222222222222222  | 0.777777777777777 | 0.000000000000000 |
| 0.111111111111112  | 0.888888888888890 | 0.000000000000000 |
| 0.555555555555556  | 0.777777777777777 | 0.000000000000000 |
| 0.444444444444444  | 0.888888888888890 | 0.000000000000000 |
| 0.888888888888890  | 0.777777777777777 | 0.000000000000000 |
| 0.777777777777782  | 0.888888888888891 | 0.000000000000000 |
